# Supplementary material
Source: PubMed Central journal article supplement (PMC3325047)
Supplement: supp_blood-2011-08-373621_blood-2011-08-373621-1.pdf [file supp_blood-2011-08-373621_blood-2011-08-373621-1.pdf]

**Shen et al. Supplemental Table 1. Primers used in real-time RT-PCR**

|                | <b>Forward primer</b>             | <b>Reverse primer</b>                |
|----------------|-----------------------------------|--------------------------------------|
| <b>β-Actin</b> | GAA ATC GTG CGT GAC ATC AAA G     | TGT AGT TTC ATG GAT GCC ACA G        |
| <b>p16</b>     | CGA ACT CTT TCG GTC GTA CCC       | CGA ATC TGC ACC GTA GTT GAG C        |
| <b>ARF</b>     | GTT CTT GGT CAC TGT GAG GAT TCA G | CCA TCA TCA TCA CCT GGT CCA G        |
| <b>p18</b>     | AAA GAT GGA ACT GGT TTT GCT GT    | TGT GCT TCA TAA GGA ACT CCA C        |
| <b>p21</b>     | GAC AGT GAG CAG TTG CG            | CTC AGA CAC CAG AGT GC               |
| <b>p27</b>     | GGG CAG ATA CGA GTG GCA G         | CCT GAG ACC CAA TTA AAG GCA C        |
| <b>c-kit</b>   | CGC CTG CCG AAA TGT ATG ACG       | GGT TCT CTG GGT TGG GGT TGC          |
| <b>Notch-1</b> | GCA GCC ACA GAA CTT ACC ACT CCA G | TAA ATG CCT CTG GAA TGT GGG<br>TGA T |
| <b>Hoxb4</b>   | CCT GGA TGC GCA AAG TTC A         | CGT CAG GTA GCG GTT GTA GTG A        |
| <b>ATM</b>     | CCA GCT TTT TGA TGC AGA TAC CA    | CCC AGC CTA CGT CTA TTT TCC T        |
| <b>Bmi-1</b>   | TTG GAG ACC AGC AAG TAT TGT C     | CGG GTG AGC TGC ATA AAA ATC<br>T     |

**Shen et al. Supplemental Table 2. MFI of r-H2AX**

| <b>Subsets</b> | <b>Transplanted cells from IR recipient<br/>(CD45.1+)</b> | <b>Transplanted cells from NR recipient<br/>(CD45.2+)</b> |
|----------------|-----------------------------------------------------------|-----------------------------------------------------------|
| <b>CD3+</b>    | <b>45.05±6.35**</b>                                       | <b>33.90±5.88</b>                                         |
| <b>B220+</b>   | <b>23.42±4.45**</b>                                       | <b>18.55±4.50</b>                                         |
| <b>Mac-1+</b>  | <b>45.54±5.99</b>                                         | <b>44.86±3.41</b>                                         |

**\*\* p<0.01 compared to transplanted cells from NR recipient.**
